## **Distinct ipRGC subpopulations mediate light's acute and circadian effects on body temperature and sleep**

Alan C. Rupp<sup>1</sup>, Michelle Ren<sup>2</sup>, Cara M. Altimus<sup>1</sup>, Diego C. Fernandez<sup>1</sup>, Melissa Richardson<sup>1</sup>, Fred Turek<sup>2</sup>, Samer Hattar<sup>1,3</sup>, and Tiffany Schmidt<sup>2\*</sup>

<sup>1</sup> Department of Biology, Johns Hopkins University, Baltimore, MD, USA.

<sup>2</sup> Department of Neurobiology, Northwestern University, Evanston, IL, USA

<sup>3</sup> Department of Neuroscience, Johns Hopkins University, Baltimore, MD, USA.

\* To whom correspondence should be addressed:

Tiffany Schmidt, [tiffany.schmidt@northwestern.edu](mailto:tiffany.schmidt@northwestern.edu)

Number of Pages: 24

Number of Figures: 4

Number of Words: 5,795

Acknowledgements: This work was supported by a Klingenstein-Simons Fellowship in the Neurosciences, a Sloan Research Fellowship in Neuroscience, and NIH 1DP2EY027983 to T.M.S. and NIH GM076430 and EY024452 to S.H.

Conflict of Interest: The authors declare no competing financial interests.

1 **Abstract**

2 The light environment greatly impacts human alertness, mood, and cognition by acute  
3 regulation of physiology and indirect alignment of circadian rhythms. Both processes  
4 require the melanopsin-expressing intrinsically photosensitive retinal ganglion cells  
5 (ipRGCs), but the relevant downstream brain areas remain elusive. ipRGCs project  
6 widely in the brain, including to the central circadian pacemaker, the suprachiasmatic  
7 nucleus (SCN). Here we show that body temperature and sleep responses to light are  
8 absent after genetic ablation of all ipRGCs except a subpopulation that projects to the  
9 SCN. Furthermore, by chemogenetic activation of the ipRGCs that avoid the SCN, we  
10 show that these cells are sufficient for acute changes in body temperature. Our results  
11 challenge the idea that the SCN is a major relay for the acute effects of light on non-  
12 image forming behaviors and identify the sensory cells that initiate light's profound  
13 effects on body temperature and sleep.

14

15

16

## 1 **Main body**

### 2 **Introduction**

3 Many essential functions are influenced by light both indirectly through alignment  
4 of circadian rhythms (photoentrainment) and acutely by a direct mechanism (sometimes  
5 referred to as 'masking') (Mrosovsky et al., 1999; Altimus et al., 2008; Lupi et al., 2008;  
6 Tsai et al., 2009; Legates et al., 2012). Dysregulation of the circadian system by  
7 abnormal lighting conditions has many negative consequences, which has motivated  
8 decades of work to identify the mechanisms of circadian photoentrainment (Golombek  
9 and Rosenstein, 2010). In contrast, it has only recently become apparent that light  
10 exposure can also acutely influence human alertness, cognition, and physiology  
11 (Chellappa et al., 2011). As a result, there is a developing awareness of light quality in  
12 everyday life (Lucas et al., 2014). It is therefore essential to human health and society to  
13 elucidate the circuitry and coding mechanisms underlying light's acute effects.

14 Intriguingly, a single population of retinal projections neurons—intrinsically  
15 photosensitive retinal ganglion cells (ipRGCs)—have been implicated in the circadian  
16 and acute effects of light on many functions, including activity, sleep, and mood (Göz et  
17 al., 2008; Güler et al., 2008; Hatori et al., 2008; Legates et al., 2012; Fernandez et al.,  
18 2018). ipRGCs integrate light information from rods, cones, and their endogenous  
19 melanopsin phototransduction cascade (Schmidt et al., 2011), and relay that light  
20 information to over a dozen central targets (Hattar et al., 2006; Ecker et al., 2010).  
21 However, the circuit mechanisms mediating ipRGC-dependent functions are largely  
22 unknown.

23 One notable exception is the control of circadian phototentrainment. It is  
24 accepted that ipRGCs mediate photoentrainment by direct innervation of the master

1 circadian pacemaker, the suprachiasmatic nucleus (SCN) of the hypothalamus (Göz et  
2 al., 2008; Güler et al., 2008; Hatori et al., 2008; Jones et al., 2015). This is supported by  
3 studies demonstrating that genetic ablation of ipRGCs results in mice with normal  
4 circadian rhythms that ‘free-run’ with their endogenous rhythm, independent of the  
5 light/dark cycle (Göz et al., 2008; Güler et al., 2008; Hatori et al., 2008). Further, mice  
6 with genetic ablation of all ipRGCs except those that project to the SCN and  
7 intergeniculate leaflet (IGL) display normal circadian photoentrainment (Chen et al.,  
8 2011), suggesting that ipRGC projections to the SCN/IGL are sufficient for  
9 photoentrainment.

10 In comparison, the mechanisms by which ipRGCs mediate acute light responses  
11 remains largely a mystery. Genetic ablation of ipRGCs or their melanopsin  
12 phototransduction cascade blocks or attenuates the acute effects of light on sleep  
13 (Altimus et al., 2008; Lupi et al., 2008; Tsai et al., 2009), wheel-running activity  
14 (Mrosovsky and Hattar, 2003; Güler et al., 2008), and mood (Legates et al., 2012;  
15 Fernandez et al., 2018). This dual role of ipRGCs in circadian and acute light responses  
16 suggests they may share a common circuit mechanism. However, whether the circuit  
17 basis for ipRGCs in the acute effects of light and circadian functions is through common  
18 or divergent pathways has yet to be determined. ipRGCs project broadly in the brain  
19 beyond the SCN (Hattar et al., 2002, 2006; Gooley et al., 2003; Baver et al., 2008).  
20 Additionally, ipRGCs are comprised of multiple subpopulations with distinct genetic,  
21 morphological, and electrophysiological signatures (Baver et al., 2008; Schmidt and  
22 Kofuji, 2009; Ecker et al., 2010; Schmidt et al., 2011) and distinct functions (Chen et al.,  
23 2011; Schmidt et al., 2014). Though there are rare exceptions (Chen et al., 2011;

1 Schmidt et al., 2014), the unique roles played by each ipRGC subsystem remain largely  
2 unknown.

3 It is currently unknown whether distinct ipRGC subpopulations mediate both the  
4 acute and circadian effects of light, and two major possibilities exist for how this occurs:  
5 (1) ipRGCs mediate both acute and circadian light responses through their innervation of  
6 the SCN or (2) ipRGCs mediate circadian photoentrainment through the SCN, but send  
7 collateral projections elsewhere in the brain to mediate acute light responses. To date,  
8 the predominant understanding has centered on a role for the SCN in both acute and  
9 circadian responses to light (Muindi et al., 2014; Morin, 2015). However, this model has  
10 been controversial due to complications associated with SCN lesions (Redlin and  
11 Mrosovsky, 1999) and alternative models proposing a role for direct ipRGC input to other  
12 central targets (Redlin and Mrosovsky, 1999; Lupi et al., 2008; Tsai et al., 2009;  
13 Hubbard et al., 2013; Muindi et al., 2014). Here, we sought to address the question of  
14 how environmental light information—through ipRGCs—mediates both the circadian and  
15 acute regulation of physiology. To do so, we investigated the ipRGC subpopulations and  
16 coding mechanisms that mediate body temperature and sleep regulation by light. We  
17 find that a molecularly distinct subset of ipRGCs is required for the acute, but not  
18 circadian, effects of light on thermoregulation and sleep. These findings suggest that,  
19 contrary to expectations, functional input to the SCN is not sufficient to drive the acute  
20 effects of light on these behaviors. These findings provide new insight into the circuits  
21 through which light regulates behavior and physiology.

## 22 **Results**

### 23 **Brn3b-positive ipRGCs are required for light's acute effects on thermoregulation**

24

1 To identify mechanisms of acute thermoregulation, we maintained mice on a 12-  
2 hr/12-hr light/dark cycle and then presented a 3-hr light pulse two hours into the night  
3 (Zeitgeber time 14, ZT14) while measuring core body temperature (Fig. 1A). The  
4 nocturnal light pulse paradigm is well-established for studying acute regulation of sleep  
5 and wheel-running activity (Mrosovsky et al., 1999; Mrosovsky and Hattar, 2003; Altimus  
6 et al., 2008; Lupi et al., 2008). We focused first on body temperature because of its  
7 critical role in cognition and alertness (Wright et al., 2002; Darwent et al., 2010), sleep  
8 induction and quality (Kräuchi et al., 1999), metabolic control (Kooijman et al., 2015) ,  
9 and circadian resetting (Buhr et al., 2010).

10 Body temperature photoentrains to the light/dark cycle with peaks during the  
11 night and troughs during the day (Fig. 1B). Both rodents and humans utilize ocular light  
12 detection to acutely adjust body temperature in response to a nocturnal light pulse (Dijk  
13 et al., 1991; Cajochen et al., 2005), though how this body temperature change is initiated  
14 by the retina and relayed to the brain is unknown. When we presented wildtype mice  
15 with a nocturnal light pulse, we observed a decrease in both body temperature and  
16 general activity compared to the previous night (Fig. 1C). The decrease in body  
17 temperature and activity was sustained for the entire 3-hr stimulus, with moderate  
18 rundown (Fig. 1C).

19 We observed that acute body temperature regulation only occurred at relatively  
20 bright light intensities (>100 lux) (Fig. S1). This, in combination with previous reports that  
21 body temperature regulation is most sensitive to short-wavelength light (Cajochen et al.,  
22 2005), suggested that it might be mediated by the insensitive and blue-shifted  
23 melanopsin phototransduction (Lucas et al., 2001; Do et al., 2009). To test this, we  
24 measured body temperature in mice lacking either functional rods and cones

1 (melanopsin-only: *Gnat1*<sup>-/-</sup>; *Gnat2*<sup>-/-</sup>) or lacking melanopsin (melanopsin KO: *Opn4*<sup>-/-</sup>).  
2 Both genotypes photoentrained their body temperature (Fig. 1D,E), with an amplitude  
3 indistinguishable from wildtype (Fig. 1F). However, we found that acute body  
4 temperature decrease to a nocturnal light pulse was present in melanopsin-only mice  
5 (*Gnat1*<sup>-/-</sup>; *Gnat2*<sup>-/-</sup>) (Fig. 1G,H), but absent from melanopsin knockout mice (*Opn4*<sup>-/-</sup>) (Fig.  
6 1I,J). This indicates that melanopsin is critical for light's ability to drive acute body  
7 temperature decreases, as it is for acute sleep induction (Altimus et al., 2008; Lupi et al.,  
8 2008; Tsai et al., 2009). These results suggest that ipRGCs are the only retinal cells that  
9 are necessary and sufficient for acute thermoregulation by light.

10 ipRGCs comprise multiple subtypes with distinct gene expression profiles, light  
11 responses, and central projections (Schmidt et al., 2011), prompting us to ask which  
12 subtypes mediate acute thermoregulation. Brn3b(+) ipRGCs project to many structures  
13 including the olivary pretectal nucleus (OPN) and dorsal lateral geniculate nucleus  
14 (dLGN), but largely avoid the SCN (Chen et al., 2011). In contrast, Brn3b(-) ipRGCs  
15 project extensively to the SCN and intergeniculate leaflet (IGL), while avoiding the OPN  
16 and dLGN (Chen et al., 2011). Ablation of Brn3b(+) ipRGCs using melanopsin-Cre and a  
17 Cre-dependent diphtheria toxin knocked into the *Brn3b* locus (*Brn3b*-DTA:  
18 *Opn4*<sup>Cre/+</sup>; *Brn3b*<sup>zDTA/+</sup>) removes virtually all ipRGC input to brain areas aside from the  
19 SCN and IGL, and these mice retain circadian photoentrainment of wheel-running  
20 activity (Chen et al., 2011).

21 When we measured body temperature in *Brn3b*-DTA mice, we found that their  
22 body temperature was photoentrained with a similar amplitude to controls (Fig. 2A-C).  
23 However, despite the presence of melanopsin in *Brn3b*-DTA mice  
24 (*Opn4*<sup>Cre/+</sup>; *Brn3b*<sup>zDTA/+</sup>), they did not acutely decrease body temperature in response to a  
25 nocturnal light pulse (Fig. 2F,G). Importantly, melanopsin heterozygous littermate

1 controls (*Opn4<sup>Cre/+</sup>*) displayed normal acute thermoregulation by light (Fig. 2D,E),  
2 indicating that halving melanopsin gene dosage is not the cause of the impaired body  
3 temperature decrease in *Brn3b*-DTA mice. These results demonstrate that *Brn3b*(+)  
4 ipRGCs are required for acute thermoregulation regulation by light but not  
5 photoentrainment of body temperature and reveal that light information to the SCN is  
6 sufficient for circadian photoentrainment of body temperature, but not its acute  
7 regulation.

8

### 9 ***Brn3b*-positive ipRGCs are sufficient for acute thermoregulation**

10 Our data thus far suggest that there are two functionally distinct populations of  
11 ipRGCs that regulate the same physiological function: (1) *Brn3b*(-) ipRGCs that project  
12 to the SCN to mediate circadian photoentrainment of body temperature and (2) *Brn3b*(+)  
13 ipRGCs that project elsewhere in the brain to mediate acute thermoregulation. To test if  
14 *Brn3b*(+) ipRGCs are sufficient for acute thermoregulation, we expressed a  
15 chemogenetic activator in *Brn3b*(+) RGCs (Fig. 3A, *Brn3b<sup>Cre/+</sup>* with intravitreal AAV2-  
16 hSyn-DIO-hM3Dq-mCherry, we refer to these mice as *Brn3b*-hM3Dq. This technique  
17 allows us to acutely activate the *Brn3b*(+) RGCs with the DREADD agonist clozapine N-  
18 oxide (CNO) (Armbruster et al., 2007). We found that after intravitreal viral delivery,  
19 many RGCs were infected, including melanopsin-expressing ipRGCs (Fig. 3A).

20 Importantly, *Brn3b*-hM3Dq mice photoentrained to a normal light/dark cycle (Fig.  
21 3B). Following CNO administration at ZT14 to depolarize the *Brn3b*(+) RGCs, we  
22 observed a robust decrease in body temperature that lasted at least 6 hours (Fig. 3D).  
23 Importantly, PBS administration in *Brn3b*-hM3Dq mice (Fig. 3C) and nocturnal CNO  
24 administration in wildtype control mice (Fig. S2) had no measurable effect on body  
25 temperature. Together, these results demonstrate that *Brn3b*(+) ipRGCs mediate the



1 acute effects of light on body temperature through extra-SCN projection(s), while Brn3b(-  
2 ) ipRGCs mediate circadian photoentrainment by projections to the SCN and/or IGL.

3

#### 4 **Brn3b-positive ipRGCs are required for light's acute effects on sleep**

5 We next examined the contribution of Brn3b(+) and Brn3b(-) ipRGCs to sleep. To  
6 do this, we used EEG and EMG recordings to compare the sleep behavior of Control  
7 (*Opn4<sup>Cre/+</sup>*) and Brn3b-DTA mice. We first analyzed the daily sleep patterns and  
8 proportion of rapid eye movement (REM) and non-REM (NREM) sleep in Control and  
9 littermate Brn3b-DTA animals. We found that Brn3b-DTA mice show normal  
10 photoentrainment of sleep and similar percent time of sleep across the 24 hour day, with  
11 only one 30 minute bin at ZT12 (light offset) showing a significant difference between  
12 Control and Brn3b-DTA animals (Fig. 4A,B). This is consistent with previous reports of  
13 normal circadian photoentrainment of daily activity rhythms in Brn3b-DTA mice (Chen et  
14 al., 2011). Control and Brn3b-DTA mice also showed similar total percent time awake or  
15 asleep across an entire day (Fig. 4C), though Brn3b-DTA mice showed a small, but  
16 significant, increase in the proportion of total sleep that was classified as NREM and  
17 decrease in the proportion of total sleep that was classified as REM (Fig. S3A).

18 We hypothesized that this small difference in sleep at lights-off in Brn3b-DTA  
19 mice could be due to a defect in their acute response to light for sleep modulation. To  
20 test this, we subjected mice to a 3-hr light pulse from ZT14–17 (Altimus et al. 2008),  
21 when the homeostatic drive for sleep is low and Control and Brn3b-DTA animals display  
22 similar amounts of sleep (Fig. 4A,B). We found that in Control mice, a light pulse  
23 decreased time awake and increased time asleep relative to baseline (previous day)  
24 (Fig. 4C,D), while in Brn3b-DTA mice a light pulse caused no change in total percent  
25 time asleep or awake (Figure 4F,G), but moderately increased sleep in the first 30-min  
26 bin (Fig. 4F). Neither Control nor Brn3b-DTA animals showed any change in proportion

1 of non-REM or REM sleep in response to the light pulse (Fig. S3B,C). These data show  
2 that Brn3b(+) ipRGCs are necessary for the acute light induction of sleep. Consistent  
3 with our body temperature data, although Brn3b-DTA mice have apparently normal input  
4 to the SCN and show normal circadian photoentrainment of wheel-running activity (Chen  
5 et al., 2011), body temperature (Fig. 2), and sleep (Fig. 4), this ipRGC innervation of the  
6 SCN is not sufficient to drive the normal light induction of sleep. These disruptions in  
7 light's acute effects on thermoregulation and sleep are circuit specific effects because  
8 Brn3b-DTA mice showed robust inhibition of wheel running behavior to a 3-hr light pulse  
9 delivered from ZT14-17 (Fig. S4).

10

## 11 **Discussion**

12 We show here that for the same physiological outcome, the acute effects of light  
13 are relayed through distinct circuitry from that of circadian photoentrainment, despite  
14 both processes requiring ipRGCs. Our results suggest that for thermoregulation and  
15 sleep, ipRGCs can be genetically and functionally segregated into Brn3b(+) 'acute' cells,  
16 and Brn3b(-) 'circadian' cells. Because Brn3b(+) cells largely avoid the SCN, and  
17 Brn3b(-) cells preferentially target the SCN, our results discount a critical role for the  
18 SCN in acute light responses in these two behaviors, and instead implicate direct ipRGC  
19 projections to other brain areas (Gooley et al., 2003; Hattar et al., 2006). Surprisingly,  
20 Brn3b(-) cells are sufficient to drive the acute and circadian effects of light on wheel  
21 running activity, demonstrating further divergence in the circuits mediating the acute  
22 effects of light on behavior, and suggesting that, unlike for thermoregulation and sleep,  
23 acute and circadian regulation of activity is driven via the SCN.

24 The specific Brn3b(+) ipRGC subtypes that mediate the light's acute effects on  
25 body temperature and sleep remain a mystery. A majority of all known ipRGC subtypes

1 (M1–M5) are lost in Brn3b-DTA mice (Chen et al., 2011), with the exception of a subset  
2 of ~200 M1 ipRGCs. In agreement with this, ipRGC projections to all minor hypothalamic  
3 targets are lost in Brn3b-DTA mice, while innervation of the SCN and part of the IGL  
4 remains intact (Chen et al. 2011, Li and Schmidt, 2018). This suggests that all non-M1  
5 subtypes and a portion of M1 ipRGCs are Brn3b(+). Each subtype has a distinct reliance  
6 on melanopsin versus rod/cone phototransduction for light detection (Schmidt and  
7 Kofuji, 2009). The necessity and sufficiency of melanopsin in mediating acute effects of  
8 light on body temperature (Fig. 1) and sleep (Altimus et al., 2008; Lupi et al., 2008; Tsai  
9 et al., 2009) suggests that a subtype with strong melanopsin, but weak rod/cone  
10 photodetection is responsible – possibly either M1 or M2 cells. However, experiments to  
11 tease this apart will require novel methods to specifically manipulate ipRGC subtypes  
12 that are currently unavailable.

13         The brain areas that mediate the acute effects of light on physiology are  
14 essentially unknown. There are many candidate areas that both receive direct ipRGC  
15 innervation and have been documented to be involved in light's acute effects on  
16 physiology, including the preoptic areas (Muindi et al. 2014), the ventral  
17 subparaventricular zone (Kramer et al., 2001), and the pretectum/superior colliculus  
18 (Miller et al., 1998). Aside from the SCN, ipRGC projections to the median (MPO) and  
19 ventrolateral preoptic (VLPO) areas have been the most widely supported. The preoptic  
20 areas are involved in sleep and body temperature regulation (Szymusiak and McGinty,  
21 2008; Nakamura, 2011) and are activated by an acute light pulse (Lupi et al., 2008; Tsai  
22 et al., 2009). In support of our behavioral findings, ipRGC projections to each of these  
23 areas is lost in Brn3b-DTA animals (Li and Schmidt, 2018). However, ipRGC projections  
24 to these areas are sparse (Gooley et al., 2003; Hattar et al., 2006), suggesting their  
25 activation by light may be indirect.

1           In contrast, the superior colliculus (SC) and pretectum receive robust innervation  
2 from ipRGCs (Hattar et al., 2002, 2006; Gooley et al., 2003; Ecker et al., 2010), their  
3 lesioning blocks light's acute effects on sleep (Miller et al., 1998), and melanopsin  
4 knockout mice lose light-induced cFOS expression in the SC (Lupi et al., 2008).  
5 However, the SC and pretectum receive robust innervation from many conventional  
6 RGCs, making the requirement for melanopsin and ipRGCs in acute sleep and body  
7 temperature regulation difficult to reconcile. It is also possible (and perhaps probable),  
8 that multiple ipRGC target regions are involved, with distinct areas mediating distinct  
9 physiological responses. Future studies silencing each retinorecipient target while  
10 activating Brn3b(+) ipRGCs will be necessary to tease apart the downstream circuits  
11 mediating light's acute effects on physiology.

12           Alternatively, it remains possible that direct ipRGC control of body temperature is  
13 the primary and critical step for many acute responses to light that are mediated by  
14 ipRGCs. In support of this possibility, changes in body temperature and heat loss can  
15 directly influence sleep induction (Kräuchi et al., 1999). This change in sleep is in turn  
16 presumably causative of at least some of light's effects on wheel-running and general  
17 activity (Mrosovsky et al., 1999). Further, core body temperature can acutely regulate  
18 cognition and alertness (Wright et al., 2002; Darwent et al., 2010). It is therefore possible  
19 that ipRGCs can have widespread influence on an animal's basic physiology and  
20 cognitive function simply by regulating body temperature.

21           Together, our identification of the photopigment and the retinal circuits mediating  
22 acute body temperature and sleep induction will facilitate better methods to promote or  
23 avoid human alertness and cognition at appropriate times of day (Chellappa et al.,  
24 2011). Our results support many recent efforts to capitalize on the specific light-detection  
25 properties of melanopsin (Lucas et al., 2014), such as its insensitivity and short-  
26 wavelength preference, to promote or avoid its activation at different times of day.

1 However, this approach is problematic because acute activation of melanopsin to  
2 promote alertness has the unintended effect of shifting the circadian clock (Provencio et  
3 al., 1994), thereby making subsequent sleep difficult. Our identification that the *Bm3b(+)*  
4 ipRGCs specifically mediate light's acute effects on body temperature provides a cellular  
5 basis for developing targeted methods for promoting acute alertness, while minimizing  
6 circadian misalignment.

## 7 **Methods**

### 8 **Animals (body temperature)**

9 All procedures were conducted in accordance with NIH guidelines and approved  
10 by the Institutional Animal Care and Use Committee of Johns Hopkins University. All  
11 mice were maintained on a mixed C57Bl/6J; 129Sv/J background and kept on ad libitum  
12 food and water under a 12-hr/12-hr light/dark cycle in group housing until  
13 experimentation, with temperature and humidity control. Male and female mice between  
14 the ages of 2 and 6 months were used for analysis.

15

### 16 **Body temperature recordings**

17 Each mouse was single-housed at the time of experiment. Surgery was  
18 conducted under tribromoethanol (Avertin) anesthesia and a telemetric probe (Starr G2  
19 E-Mitter) was implanted in the peritoneal cavity to monitor core body temperature and  
20 general activity. Data was collected in continuous 1- or 2-min bins using VitalVIEW  
21 software and analyzed in Microsoft Excel. All experiments were conducted at least 10  
22 days after surgery. Lights were controlled by a programmable timer and all lights were  
23 6500K CFL bulbs illuminated each cage at ~500 lux. Light intensity (Figure S1) was  
24 modulated using

25 *Bm3b<sup>Cre/+</sup>* mice were anesthetized with tribromoethanol (Avertin) and 0.5–1  $\mu$ l  
26 AAV2-hSyn-DIO-hM3Dq-mCherry (UNC Vector Core) was injected intravitreally in one

1 eye using a picospritzer and pulled pipet. At least one week later, animals underwent  
2 surgery for implantation of telemetric probes (as above). All experiments were conducted  
3 at least 10 days after telemetric probe implantation and at least three weeks after viral  
4 injection. After behavior, the eyes of each animal were inspected to ensure that >50%  
5 infection had been achieved. We routinely saw >80% of the retinas were infected as we  
6 have described previously (Keenan et al. 2016).

7 Diurnal amplitude was measured by subtracting the mean body temperature for  
8 the light cycle (ZT0-12) from the mean body temperature for the dark cycle (ZT12-24).  
9 Mean body temperature during testing used all data from ZT14-17. For CNO  
10 experiments, injections were carried out near ZT14, but specific times were recorded for  
11 each mouse to align the data to the time of injection. Comparisons of mean body  
12 temperature after PBS or CNO utilized the 6 hours following injection.

13 Clozapine-N-oxide (Sigma) was prepared as a 0.1 mg/ml solution in PBS and  
14 injected at 1 mg/kg intraperitoneally at ZT14. After behavior, the eyes of each animal  
15 were inspected to ensure that >50% infection had been achieved. We routinely saw  
16 >80% of the retinas were infected as we have described previously (Keenan et al. 2016).

17

## 18 **Animals (Sleep)**

19 All procedures were conducted in accordance with NIH guidelines and approved  
20 by the Institutional Animal Care and Use Committee of Northwestern University.

21 *Opn4*Cre and *Brn3b*<sup>z-dta</sup> were maintained on a mixed C57Bl/6J; 129Sv/J background  
22 (Hattar et al., 2002, 2006; Mu et al., 2005). Male and female littermate *Opn4*<sup>Cre/+</sup> and  
23 *Opn4*<sup>Cre/+</sup>; *Brn3b*<sup>z-dta/+</sup> animals between the ages of 2 and 3 months were used for sleep  
24 analysis.

25

## 26 **Sleep recording**

1 Male and female littermate *Opn4<sup>Cre/+</sup>* and *Opn4<sup>Cre/+</sup>; Brn3b<sup>z-dta/+</sup>* mice were used  
2 for sleep recordings. Electroencephalogram (EEG) and electromyogram (EMG)  
3 electrode implantation was performed simultaneously at 8 weeks of age. Mice were  
4 anesthetized with a ketamine/xylazine (98 and 10 mg/kg respectively) and a 2-channel  
5 EEG and 1-channel EMG implant (Pinnacle Technology) was affixed to the skull. Mice  
6 were transferred to the sleep-recording cage 6 days after surgery, tethered with a  
7 preamplifier, and allowed 3 days to acclimate to the new cage and tether. Mice were  
8 housed in 12:12 light/dark conditions before and after EEG implantation. EEG and EMG  
9 recording began simultaneously at the end of the habituation period, which were  
10 displayed on a monitor and stored in a computer for analysis of sleep states. The high  
11 pass filter setting for both EEG channels was set at 0.5 Hz and low pass filtering was set  
12 at 100 Hz. EMG signals were high pass filtered at 10 Hz and subjected to a 100 Hz low  
13 pass cutoff. EEG and EMG recordings were collected in PAL 8200 sleep recording  
14 software (Pinnacle Technology) and scored, using a previously described, multiple  
15 classifier, automatic sleep scoring system, into 10-sec epochs as wakefulness, NREM  
16 sleep, or REM sleep on the basis of rodent sleep criteria (Gao et al., 2016). Light source  
17 for all sleep experiments was a 3000 Kelvin light source at 500 lux.

## 18 **Wheel-running activity and Masking experiment**

19 Mice were placed in cages with a 4.5-inch running wheel, and their activity was  
20 monitored with VitalView software (MiniMitter). Analyses of wheel running activity were  
21 calculated with ClockLab (Actimetrics). We used 500 lux light intensity. Mice were  
22 initially placed under 12:12 LD masking experiments. Mice were exposed, in their home  
23 cage, to a timer-controlled 3-hour light pulse at ZT14-ZT17. Percent activity for each  
24 mouse was normalized to its own activity at ZT13 (1 hour before light pulse), and  
25 analyzed in 30-minute bins.

1

## 2 **Statistics**

3 All statistical tests were performed in Graphpad Prism or R 3.4.4. Specific tests  
4 are listed in the text and figure legends.

5

6

## 7 **References**

- 8 Altimus CM, Güler AD, Villa KL, McNeill DS, LeGates TA, Hattar S (2008) Rods-cones  
9 and melanopsin detect light and dark to modulate sleep independent of image  
10 formation. *Proc Natl Acad Sci USA* 105:19998–20003.
- 11 Armbruster BN, Li X, Pausch MH, Herlitze S, Roth BL (2007) Evolving the lock to fit the  
12 key to create a family of G protein-coupled receptors potently activated by an inert  
13 ligand. *Proc Natl Acad Sci USA* 104:5163–5168.
- 14 Baver SB, Pickard GE, Sollars PJ, Pickard GE (2008) Two types of melanopsin retinal  
15 ganglion cell differentially innervate the hypothalamic suprachiasmatic nucleus and  
16 the olivary pretectal nucleus. *Eur J Neurosci* 27:1763–1770 Available at:  
17 <http://www.ncbi.nlm.nih.gov/pubmed/18371076> [Accessed July 20, 2011].
- 18 Buhr ED, Yoo S, Takahashi JS (2010) Temperature as a universal resetting cue for  
19 mammalian circadian oscillators. *Science* (80- ) 281:379–386.
- 20 Cajochen C, Münch M, Kriebel S, Kräuchi K, Steiner R, Oelhafen P, Orgül S, Wirz-  
21 Justice A (2005) High sensitivity of human melatonin, alertness, thermoregulation,  
22 and heart rate to short wavelength light. *J Clin Endocrinol Metab* 90:1311–1316  
23 Available at: <http://press.endocrine.org/doi/abs/10.1210/jc.2004-0957>.
- 24 Chellappa SL, Steiner R, Blattner P, Oelhafen P, Götz T, Cajochen C (2011) Non-visual  
25 effects of light on melatonin, alertness and cognitive performance: Can blue-  
26 enriched light keep us alert? *PLoS One* 6:e16429.



- 1 Chen S-K, Badea TC, Hattar S (2011) Photoentrainment and pupillary light reflex are  
2 mediated by distinct populations of ipRGCs. *Nature* 476:92–95 Available at:  
3 <http://www.ncbi.nlm.nih.gov/pubmed/21765429> [Accessed July 20, 2011].
- 4 Darwent D, Ferguson SA, Sargent C, Paech GM, Williams L, Zhou X, Matthews RW,  
5 Dawson D, Kennaway DJ, Roach GD (2010) Contribution of core body  
6 temperature, prior wake time, and sleep stages to cognitive throughput  
7 performance during forced desynchrony. *Chronobiol Int* 27:898–910 Available at:  
8 <http://www.tandfonline.com/doi/full/10.3109/07420528.2010.488621>.
- 9 Dijk DJ, Cajochen C, Borbély AA (1991) Effect of a single 3-hour exposure to bright light  
10 on core body temperature and sleep in humans. *Neurosci Lett* 121:59–62 Available  
11 at: <http://www.sciencedirect.com/science/article/pii/030439409190649E>.
- 12 Do MTH, Kang SH, Xue T, Zhong H, Liao H-W, Bergles DE, Yau K-W (2009) Photon  
13 capture and signalling by melanopsin retinal ganglion cells. *Nature* 457:281–287  
14 Available at: <http://www.ncbi.nlm.nih.gov/pubmed/19118382>.
- 15 Ecker JL, Dumitrescu ON, Wong KY, Alam NM, Chen S-K, LeGates TA, Renna JM,  
16 Prusky GT, Berson DM, Hattar S (2010) Melanopsin-expressing retinal ganglion-  
17 cell photoreceptors: cellular diversity and role in pattern vision. *Neuron* 67:49–60  
18 Available at:  
19 <http://www.pubmedcentral.nih.gov/articlerender.fcgi?artid=2904318&tool=pmcentrez&rendertype=abstract> [Accessed July 21, 2010].
- 21 Fernandez DC, Fogerson PM, Lazzerini Ospri L, Thomsen MB, Layne RM, Severin D,  
22 Zhan J, Singer JH, Kirkwood A, Zhao H, Berson DM, Hattar S (2018) Light affects  
23 mood and learning through distinct retina-brain pathways. *Cell* 175:71–84.
- 24 Gao V, Turek F, Vitaterna M (2016) Multiple classifier systems for automatic sleep  
25 scoring in mice. *J Neurosci Methods* 264:33–39.

- 1 Golombek DA, Rosenstein RE (2010) Physiology of circadian entrainment. *Physiol Rev*  
2 90:1063–1102.
- 3 Gooley JJ, Lu J, Fischer D, Saper CB (2003) A broad role for melanopsin in nonvisual  
4 photoreception. *J Neurosci* 23:7093–7106.
- 5 Göz D, Studholme K, Lappi DA, Rollag MD, Provencio I, Morin LP (2008) Targeted  
6 destruction of photosensitive retinal ganglion cells with a saporin conjugate alters  
7 the effects of light on mouse circadian rhythms. *PLoS One* 3:e3153.
- 8 Güler AD, Ecker JL, Lall GS, Haq S, Altimus CM, Liao H, Gu AD, Barnard AR, Cahill H,  
9 Badea TC, Zhao H, Hankins MW, Berson DM, Lucas RJ, Yau K, Hattar S (2008)  
10 Melanopsin cells are the principal conduits for rod–cone input to non-image-forming  
11 vision. *Nature* 453:102–105.
- 12 Hatori M, Le H, Vollmers C, Keding SR, Tanaka N, Buch T, Waisman A, Schmedt C,  
13 Jegla TJ, Panda S (2008) Inducible ablation of melanopsin-expressing retinal  
14 ganglion cells reveals their central role in non-image forming visual responses.  
15 *PLoS One* 3:e2451 Available at:  
16 <http://www.pubmedcentral.nih.gov/articlerender.fcgi?artid=2396502&tool=pmcentrez&rendertype=abstract>.  
17
- 18 Hattar S, Kumar M, Park A, Tong P, Tung J, Yau K, Berson DM (2006) Central  
19 projections of melanopsin- expressing retinal ganglion cells in the mouse. *J Comp*  
20 *Neurol* 349:326–349.
- 21 Hattar S, Liao H, Takao M, Berson DM, Yau K (2002) Melanopsin-containing retinal  
22 ganglion cells: architecture, projections, and intrinsic photosensitivity. *Science* (80- )  
23 295:1065–1070.
- 24 Hubbard J, Ruppert E, Gropp C-M, Bourgin P (2013) Non-circadian direct effects of light  
25 on sleep and alertness: Lessons from transgenic mouse models. *Sleep Med Rev*  
26 17:445–452 Available at:

- 1 <http://linkinghub.elsevier.com/retrieve/pii/S1087079213000026>.
- 2 Jones JR, Tackenberg MC, McMahon DG (2015) Manipulating circadian clock neuron  
3 firing rate resets molecular circadian rhythms and behavior. *Nat Neurosci* 18:373–  
4 375 Available at: <http://dx.doi.org/10.1038/nn.3937>.
- 5 Keenan WT, Rupp AC, Ross RA, Somasundaram P, Hiriyanna S, Wu Z, Badea TC,  
6 Robinson PR, Lowell BB, Hattar SS (2016) A visual circuit uses complementary  
7 mechanisms to support transient and sustained pupil constriction. *Elife* 5:e15392.
- 8 Kooijman S, van den Heuvel JK, Rensen PCN (2015) Neuronal control of brown fat  
9 activity. *Trends Endocrinol Metab* xx:1–12 Available at:  
10 <http://dx.doi.org/10.1016/j.tem.2015.09.008>.
- 11 Kramer A, Yang F, Snodgrass P, Li X, Scammell TE, Davis FC, Weitz CJ (2001)  
12 Regulation of daily locomotor activity and sleep by hypothalamic EGF receptor  
13 signaling. *Science* (80- ) 294:2511–2515 Available at:  
14 <http://www.ncbi.nlm.nih.gov/pubmed/11752569> [Accessed June 21, 2011].
- 15 Kräuchi K, Cajochen C, Werth E, Wirz-justice A (1999) Warm feet promote the rapid  
16 onset of sleep. *Nature* 401:36–37.
- 17 Legates TA, Altimus CM, Wang H, Lee H, Yang S, Zhao H, Kirkwood A, Weber ET,  
18 Hattar S (2012) Aberrant light directly impairs mood and learning through  
19 melanopsin-expression neurons. *Nature* 491:594–598.
- 20 Li JY, Schmidt TM (2018) Divergent projection patterns of M1 ipRGC subtypes. *J Comp*  
21 *Neurol* 526:2010–2018.
- 22 Lucas RJ, Douglas RH, Foster RG (2001) Characterization of an ocular photopigment  
23 capable of driving pupillary constriction in mice. *Nat Neurosci* 4:621–626.
- 24 Lucas RJ, Peirson SN, Berson DM, Brown TM, Cooper HM, Czeisler CA, Figueiro MG,  
25 Gamlin PDR, Lockley SW, O’Hagan JB, Price LLA, Provencio I, Skene DJ, Brainard

- 1 GC (2014) Measuring and using light in the melanopsin age. *Trends Neurosci* 37:1–  
2 9 Available at: <http://www.ncbi.nlm.nih.gov/pubmed/24287308> [Accessed January  
3 31, 2014].
- 4 Lupi D, Oster H, Thompson S, Foster RG (2008) The acute light-induction of sleep is  
5 mediated by OPN4-based photoreception. *Nat Neurosci* 11:1068–1073 Available  
6 at: <https://www.ncbi.nlm.nih.gov/pubmed/18711396> [Accessed August 7, 2010].
- 7 Miller AM, Obermeyer WH, Behan M, Benca RM (1998) The superior colliculus–  
8 pretectum mediates the direct effects of light on sleep. *Proc Natl Acad Sci USA*  
9 95:8957–8962.
- 10 Morin LP (2015) A path to sleep is through the eye. *eNeuro* 2.
- 11 Mrosovsky N, Foster RG, Salmon PA (1999) Thresholds for masking responses to light  
12 in three strains of retinally degenerate mice. *J Comp Physiol A Neuroethol Sens*  
13 *Neural Behav Physiol* 184:423–428 Available at:  
14 <http://www.ncbi.nlm.nih.gov/pubmed/10377976>.
- 15 Mrosovsky N, Hattar S (2003) Impaired masking responses to light in melanopsin-  
16 knockout mice. *Chronobiol Int* 20:989–999.
- 17 Mu X, Fu X, Sun H, Beremand PD, Thomas TL, Klein WH (2005) A gene network  
18 downstream of transcription factor Math5 regulates retinal progenitor cell  
19 competence and ganglion cell fate. *Dev Biol* 280:467–481.
- 20 Muindi F, Zeitzer JM, Heller HC (2014) Retino-hypothalamic regulation of light-induced  
21 murine sleep. *Front Syst Neurosci* 8:1–9 Available at:  
22 <http://journal.frontiersin.org/article/10.3389/fnsys.2014.00135/abstract>.
- 23 Nakamura K (2011) Central circuitries for body temperature regulation and fever. *Am J*  
24 *Physiol Regul Integr Comp Physiol* 305:1207–1228.
- 25 Provencio I, Wong S, Lederman AB, Argamaso SM, Foster RG (1994) Visual and  
26 circadian responses to light in aged retinally degenerate mice. *Vis Res* 34:1799–

- 1 1806 Available at: <http://www.ncbi.nlm.nih.gov/pubmed/7941382>.
- 2 Redlin U, Mrosovsky N (1999) Masking by light in hamsters with SCN lesions. *J Comp*  
3 *Physiol A* 184:439–448 Available at:  
4 <http://www.ncbi.nlm.nih.gov/pubmed/10377979>.
- 5 Schmidt TM, Alam NM, Chen S, Kofuji P, Li W, Prusky GT, Hattar S (2014) A role for  
6 melanopsin in alpha retinal ganglion cells and contrast detection. *Neuron* 82:781–  
7 788 Available at: <http://linkinghub.elsevier.com/retrieve/pii/S0896627314002529>  
8 [Accessed May 22, 2014].
- 9 Schmidt TM, Chen S-K, Hattar S (2011) Intrinsically photosensitive retinal ganglion cells:  
10 many subtypes, diverse functions. *Trends Neurosci* 34:572–580 Available at:  
11 <http://www.ncbi.nlm.nih.gov/pubmed/21816493> [Accessed August 16, 2011].
- 12 Schmidt TM, Kofuji P (2009) Functional and morphological differences among  
13 intrinsically photosensitive retinal ganglion cells. *J Neurosci* 29:476–482.
- 14 Szymusiak R, McGinty D (2008) Hypothalamic regulation of sleep and arousal. *Ann N Y*  
15 *Acad Sci* 1129:275–286 Available at: <http://dx.doi.org/10.1196/annals.1417.027>.
- 16 Tsai JW, Hannibal J, Hagiwara G, Colas D, Ruppert E, Ruby NF, Heller HC, Franken P,  
17 Bourgin P (2009) Melanopsin as a sleep modulator: circadian gating of the direct  
18 effects of light on sleep and altered sleep homeostasis in *Opn4*<sup>-/-</sup> mice. *PLoS Biol*  
19 7:e1000125.
- 20 Wright KPJ, Hull JT, Czeisler CA (2002) Relationship between alertness, performance,  
21 and body temperature in humans. *Am J Physiol Regul Integr Comp Physiol*  
22 283:R1370–R1377.
- 23
- 24
- 25
- 26

1 **Figure legends**

2 **Figure 1: Melanopsin mediates the acute effects of light on body temperature. (A)**

3 Paradigm to measure body temperature continuously in a 12:12 light dark cycle with a 3-  
4 hour light pulse at ZT14. **(B)** 48 hours of continuous body temperature monitoring in  
5 wildtype male mice (n = 13) **(C)** Body temperature in WT during light pulse, compared to  
6 baseline (ZT14).  $P < 0.001$ , paired t-test of mean temperature compared to previous  
7 night. **(E)** Melanopsin-only mice (*Gnat1*<sup>-/-</sup>; *Gnat2*<sup>-/-</sup>, n = 11) and **(E)** melanopsin knockout  
8 (*Opn4*<sup>-/-</sup>, n = 6) 48-hour diurnal body temperature. **(F)** Diurnal body temperature  
9 amplitude in the three groups.  $P > 0.347$  for effect of group by one-way ANOVA. **(G)**  
10 Body temperature in melanopsin-only during light pulse, relative to baseline (ZT14). **(H)**  
11 Paired comparison of body temperature during light pulse compared to previous night.  $P$   
12  $< 0.001$  by paired t-test. **(I)** Body temperature in melanopsin knockout during light pulse,  
13 relative to baseline (ZT14). **(J)** Paired comparison of body temperature during light pulse  
14 compared to previous night.

15

16 **Figure 2: Brn3b-negative ipRGCs are insufficient for acute body temperature**

17 **regulation via the SCN. (A)** Diurnal body temperature in control (*Opn4*<sup>Cre/+</sup>, n = 9) and  
18 **(B)** Brn3b-DTA (*Opn4*<sup>Cre/+</sup>; *Brn3b*<sup>DTA/+</sup>, n = 7). **(C)** Diurnal body temperature amplitude in  
19 the two groups.  $P = 0.223$  by t-test. **(D)** Body temperature in control during light pulse,  
20 relative to baseline (ZT14). **(E)** Paired comparison of body temperature during light pulse  
21 compared to previous night.  $P = 0.001$  by paired t-test. **(F)** Body temperature in Brn3b-  
22 DTA during light pulse, relative to baseline (ZT14). **(G)** Paired comparison of body  
23 temperature during light pulse compared to previous night.  $P = 0.287$  by paired t-test.

24

25 **Figure 3: Activation of Brn3b-positive RGCs is sufficient to drive sustained body**

26 **temperature decreases. (A)** Diagram of intravitreal delivery of AAV2-hSyn-DIO-hM3Dq-

1 mCherry to *Brn3b*<sup>Cre/+</sup> mice, and confirmation of infection of ipRGCs. (B) 54-hr  
2 continuous diurnal body temperature recordings in *Brn3b*-hM3Dq mice, with injections of  
3 PBS then CNO on consecutive nights at ZT14. (C) Change in body temperature after  
4 PBS injection, relative to baseline (time of injection). (D) Change in body temperature  
5 after CNO injection, relative to baseline (time of injection). (E) Paired comparison of the  
6 change in body temperature with either PBS or CNO injection.  $P = 0.002$  by paired t-test.

7

8 **Figure 4. *Brn3b*-positive M1 ipRGCs are not required for circadian**

9 **photoentrainment of sleep, but are required for its acute induction by light.** (A–C)

10 Percent time spent asleep in 1-hr bins across the 24-hr day for (A) Control (black) mice  
11 ( $n = 14$ ) and (B) *Brn3b*-DTA (blue) mice ( $n = 13$ ) lacking *Brn3b*-positive ipRGCs. Both  
12 lines showed normal photoentrainment of sleep, with no main effect of genotype  
13 compared to Control by repeated-measures two-way ANOVA ( $F(1, 25) = 1.108$ ,  $P =$   
14  $0.303$ ). *Brn3b*-DTA mice showed a significant reduction in sleep only at lights off (ZT 12)  
15 by Sidak's multiple comparisons test ( $P = 0.029$ ). (C) Percent time spent awake and  
16 asleep in Control (black) and *Brn3b*-DTA mice (blue). No differences were observed  
17 between genotypes by t-test ( $P = 0.316$ ). (D–G) Percent time spent asleep for (D)  
18 Control mice (black) and (F) *Brn3b*-DTA mice (blue) at baseline (dark line) and during  
19 the three hour light pulse (light line). Significant difference from baseline determined by  
20 repeated measures two-way ANOVA. Significant effect of treatment for Controls ( $F(1,$   
21  $13) = 38.09$ ,  $P < 0.001$ ), but not for *Brn3b*-DTA ( $F(1, 12) = 0.8496$ ,  $P = 0.375$ ). (E)  
22 Control mice show significantly more sleep and less wake during a light pulse (paired t-  
23 test) while (G) *Brn3b*-DTA mice showed no change in percent sleep or wake during the  
24 same period. Data is mean for ZT14–17.

25

# Figure 1

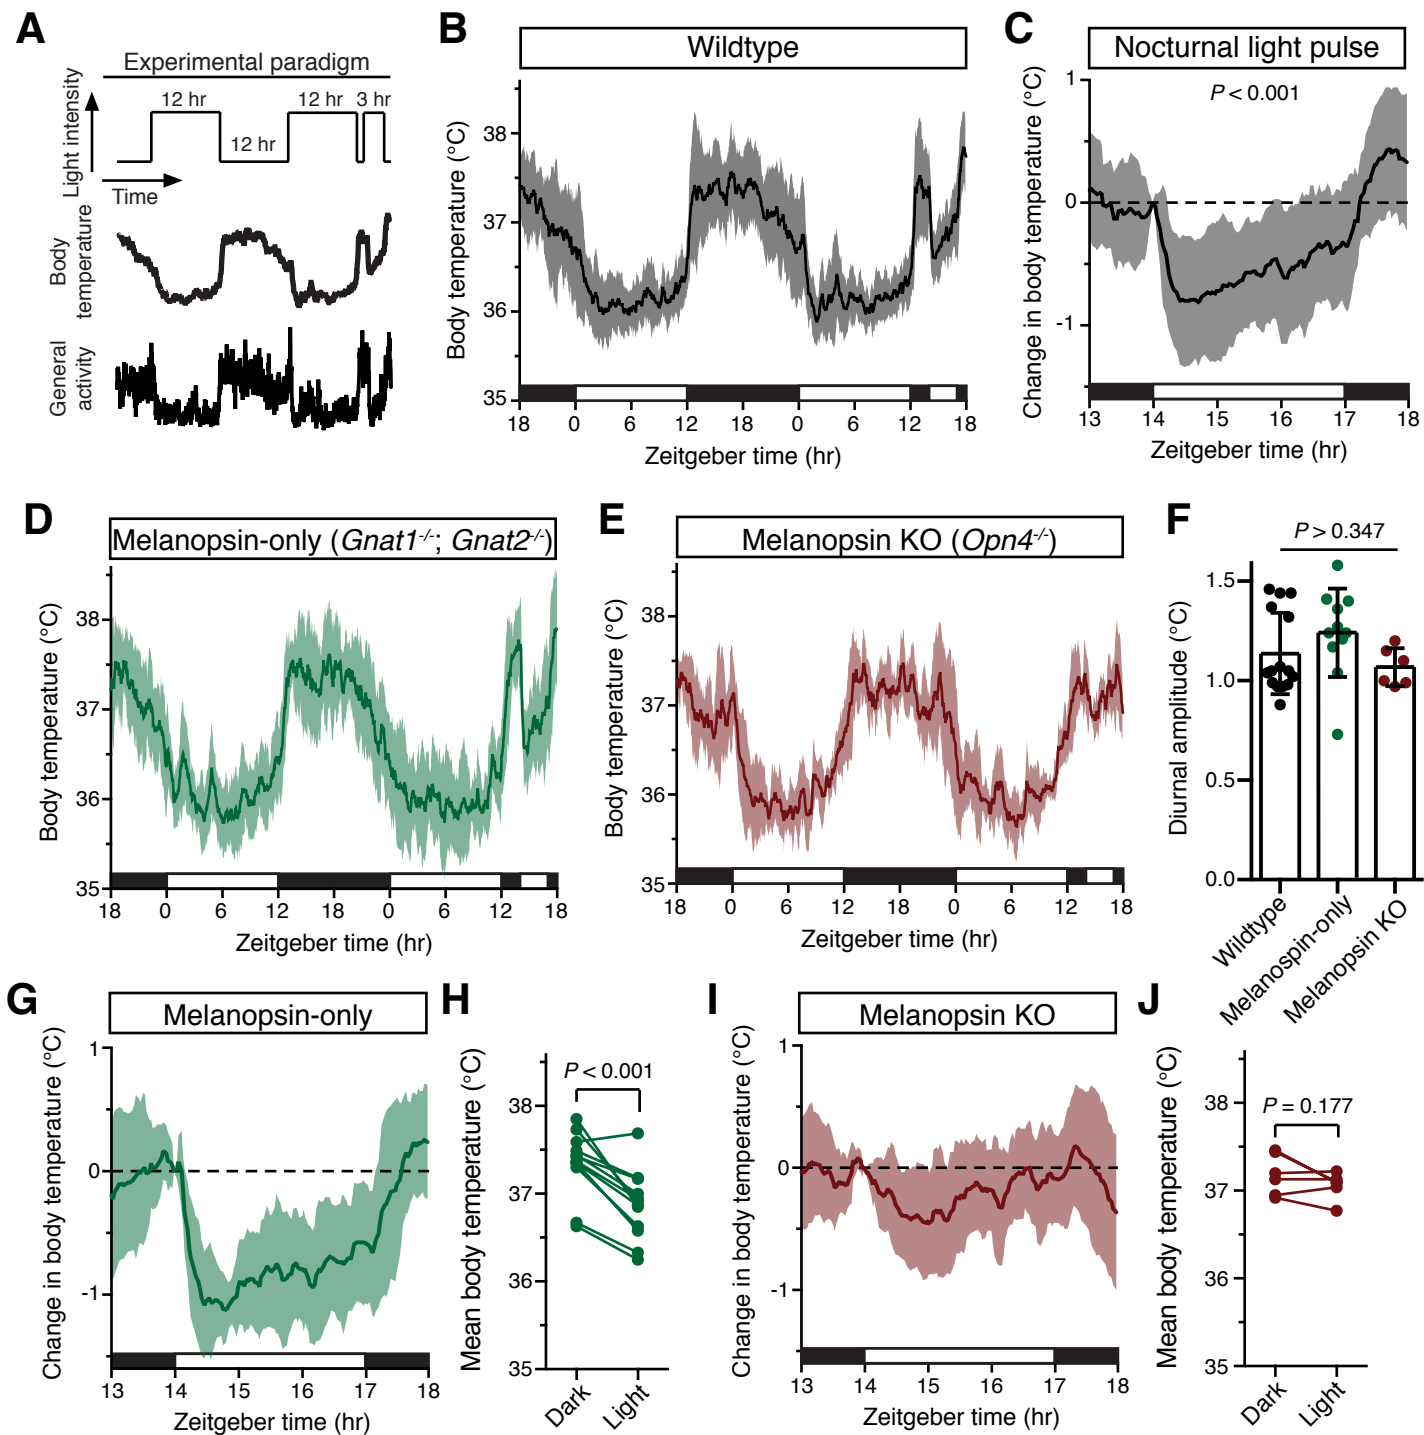



## Figure 2

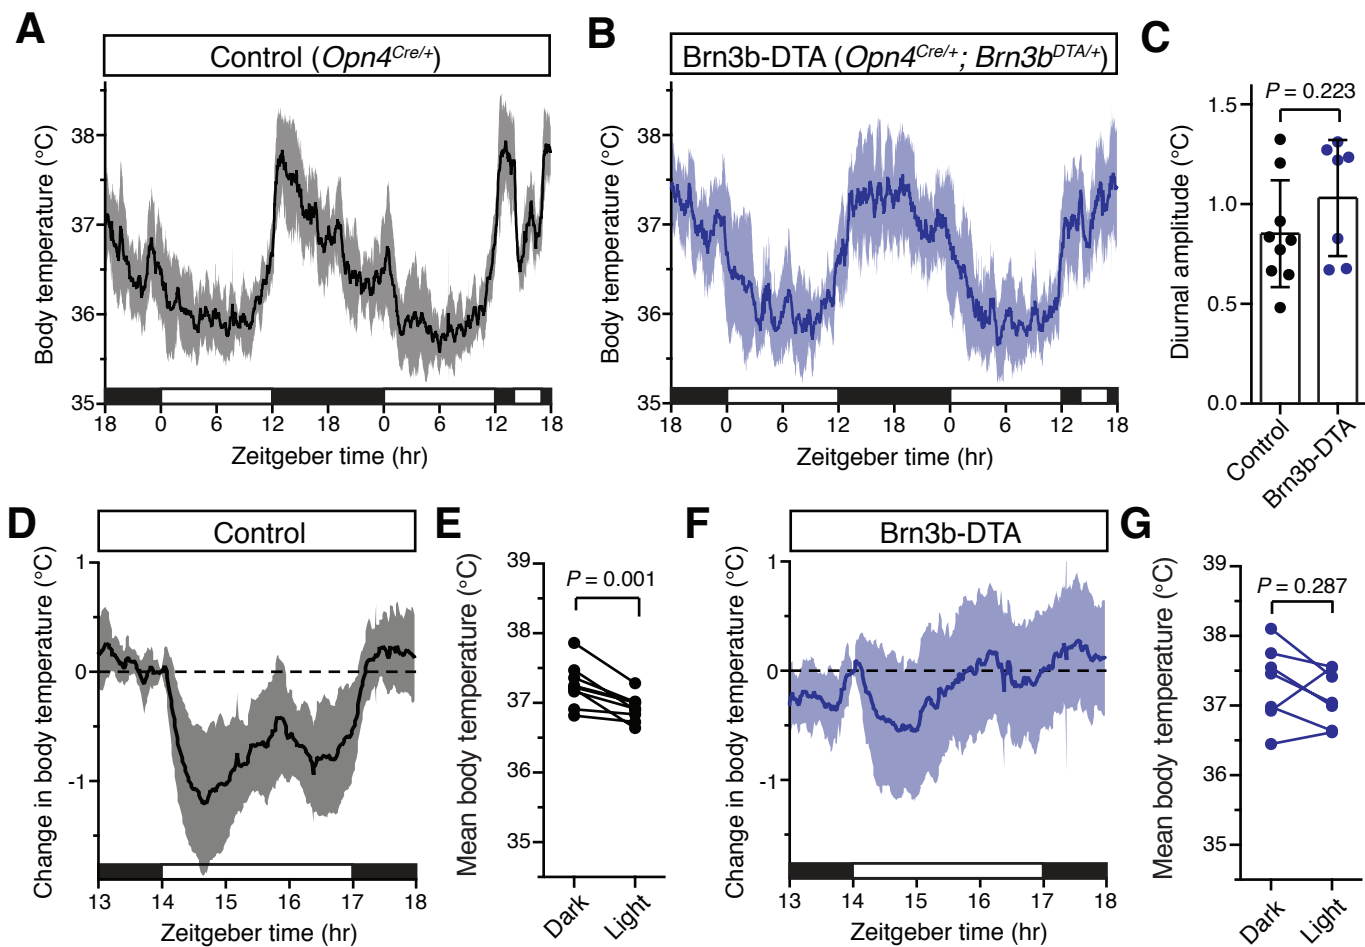

## Figure 3

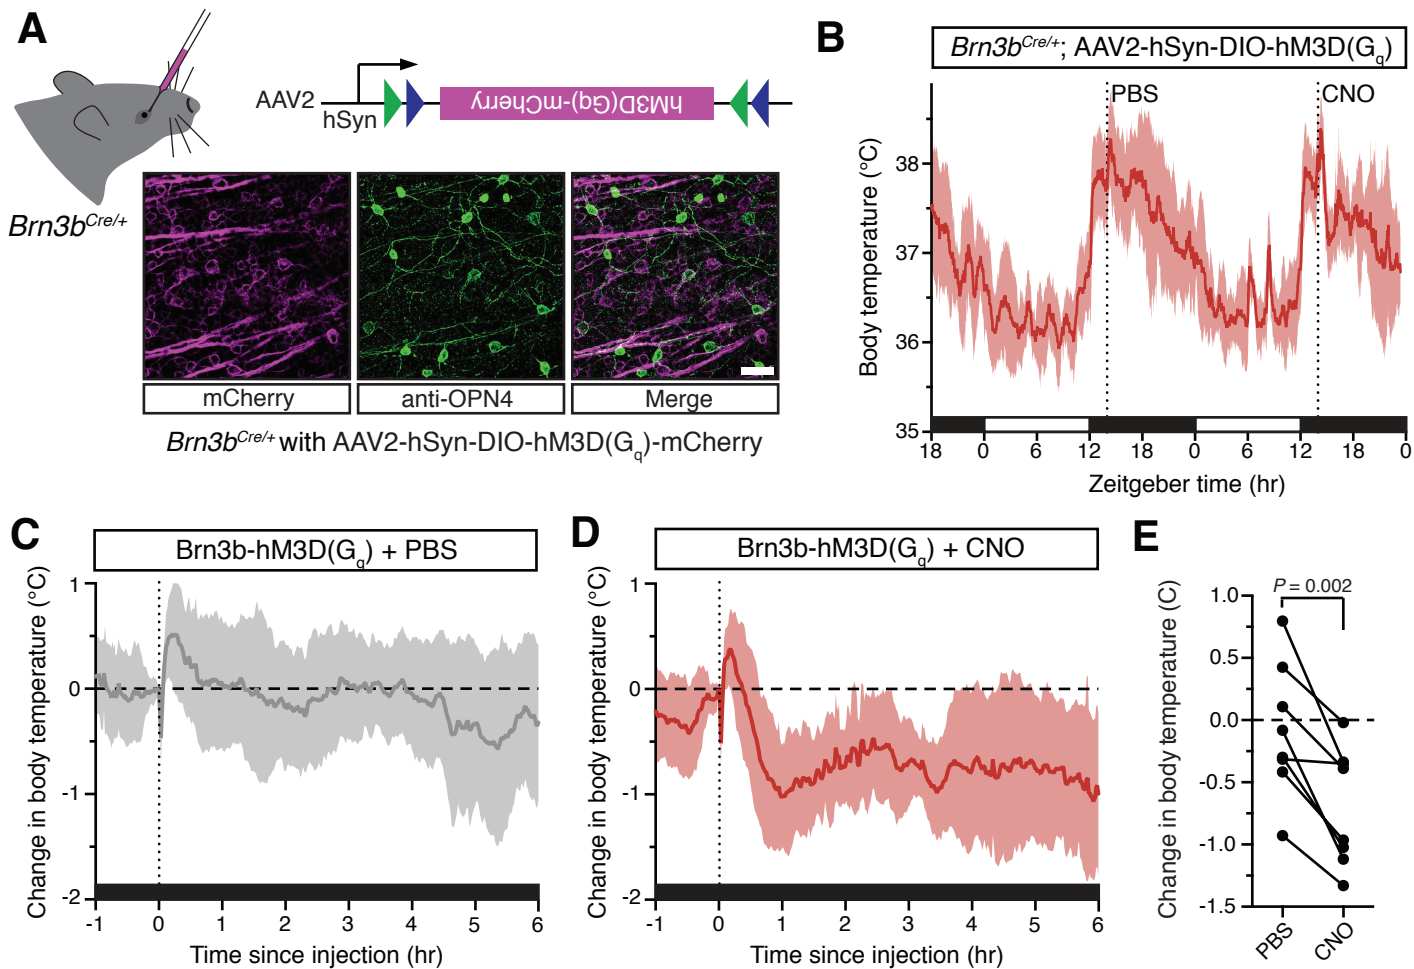

## Figure 4

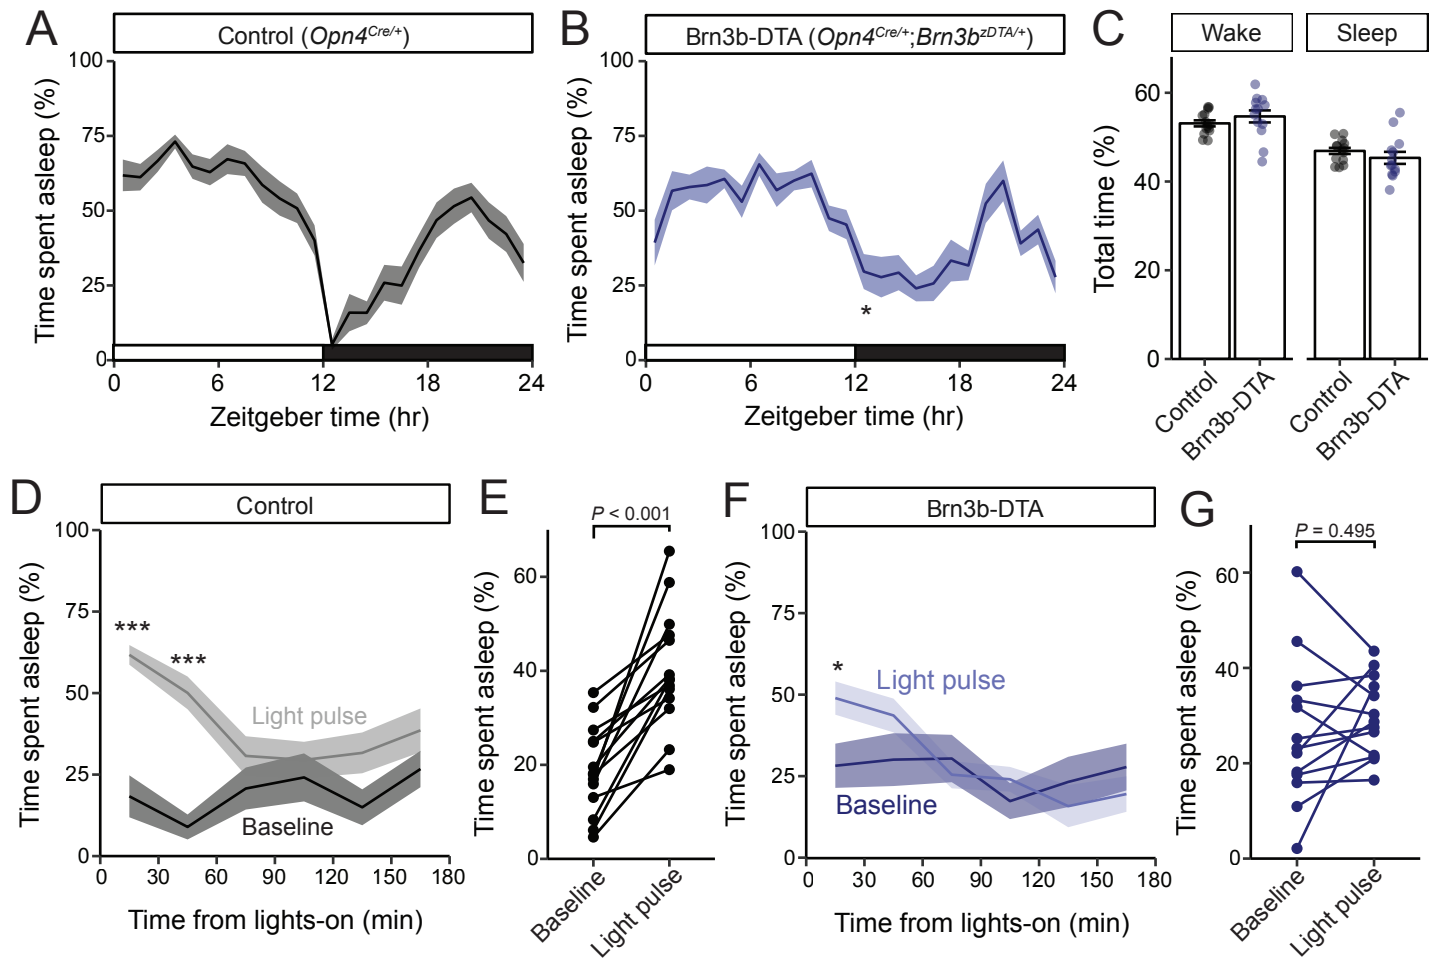

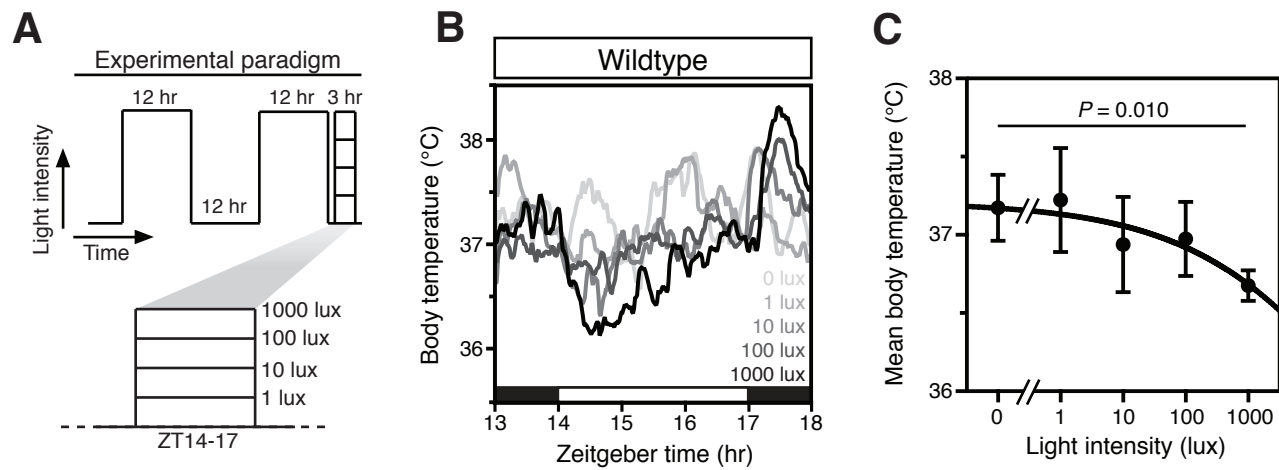

**Figure S1: Intensity-dependent decrease in core body temperature during a nocturnal light pulse.** (a) Experimental paradigm consisting of a 12-hr/12-hr light/dark cycle with a single 3-hr light pulse starting at Zeitgeber time (ZT) 14 (i.e. 2 hours after lights-off). Each experimental night, a light pulse was given at a specific environmental light intensity ranging from 1 to 1000 lux in log<sub>10</sub> increments. (b) Mean body temperature for wildtype mice ( $n = 4$ ) that were administered a light pulse at ZT14 of varying intensity (shown as shades of gray). Robust thermoregulation by light only occurs at bright intensities. Black and white bars on the  $x$  axis refer to time of lights-off and lights-on. (c) Quantification of the mean body temperature during the 3-hr light pulse for the wildtype mice in **b** ( $n = 4$ , mean  $\pm$  SD) fit with a sigmoidal dose-response curve. There is a statistically significant effect of light intensity on body temperature ( $P = 0.010$ ), as determined by the main effect of a repeated measures one-way ANOVA.

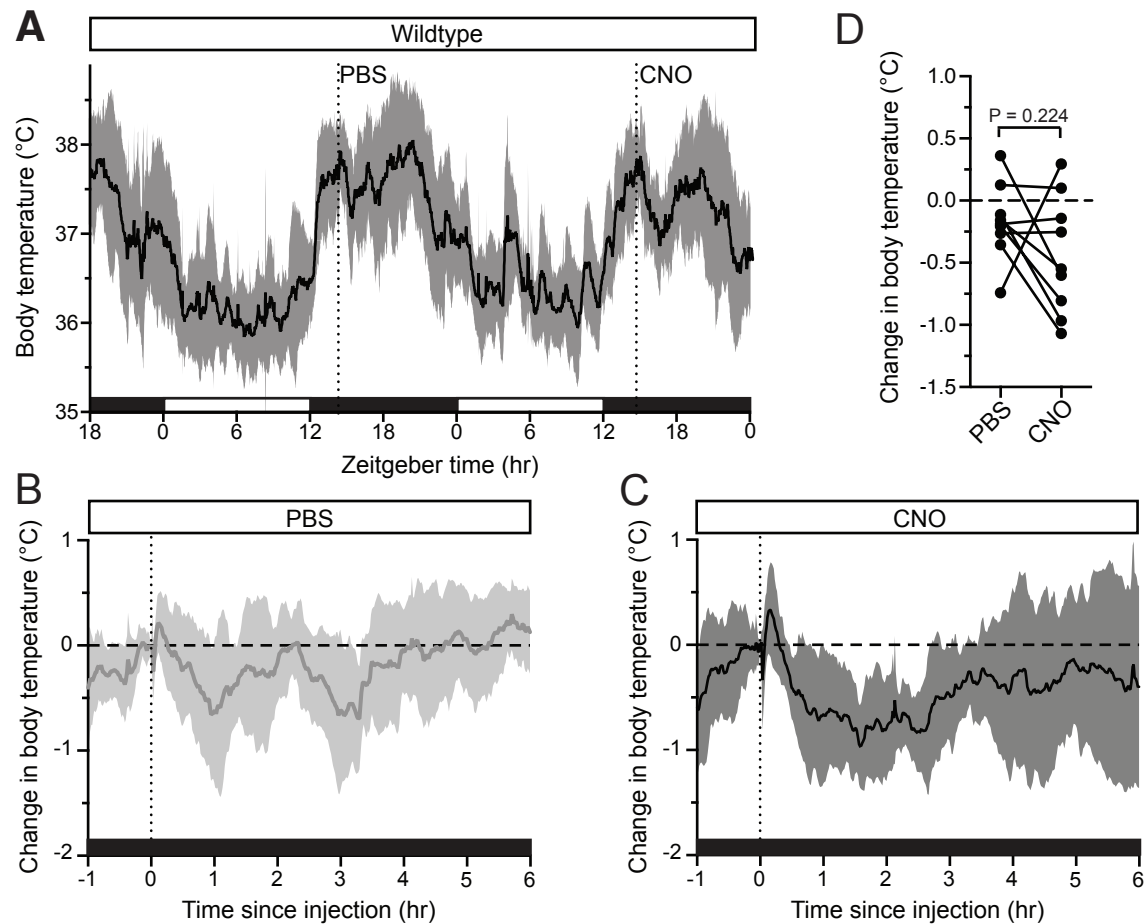

**Figure S2: No effect of CNO on body temperature in wildtype mice.** (A) Wildtype mice body temperature ( $n = 9$ ) was monitored continuously and PBS was injected on night 1 at ZT14, followed by CNO injection (1 mg/kg) on night 2 at ZT14. (B,C) Normalized body temperature of either (B) PBS or (C) CNO injection. Both injections generate a rapid body temperature increase, followed by a dip below the reference value, before returning to normal. (D) Paired comparisons of body temperature changes in response to either PBS or CNO administration.

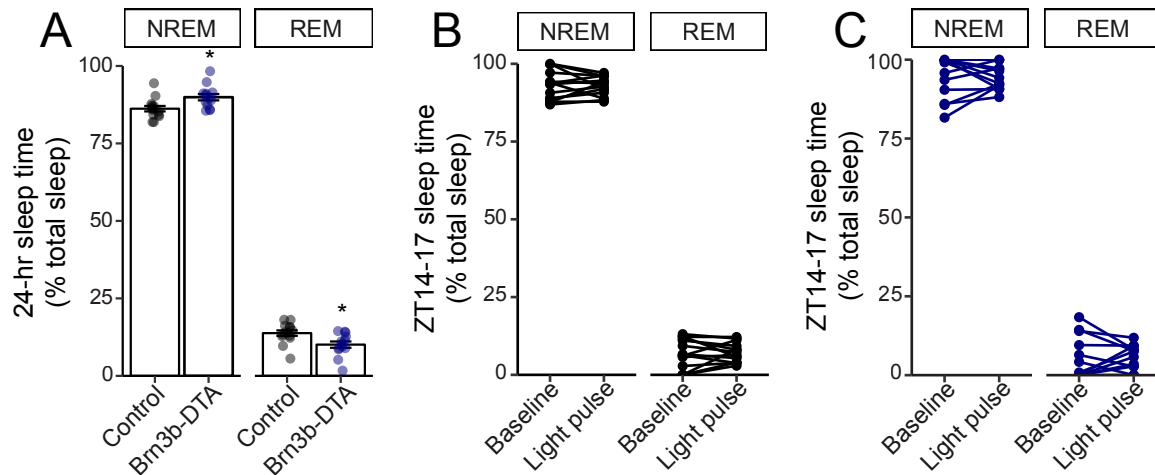

**Figure S3: NREM and REM measurements in Control and Brn3b-DTA mice.** (A) Percent sleep recorded across the 24 hour day as NREM vs. REM in Control (black) and Brn3b-DTA mice (blue). Brn3b-DTA mice showed a small but significant increase in NREM and decrease in REM sleep compared to Control mice. REM: rapid eye movement, NREM: non-REM. Control: n = 14. Brn3b-DTA: n = 13. \* $P = 0.011$  by t-test. (B,C) Sleep stage quantification during ZT14-17, either baseline night or light pulse. No significant differences were seen in either (B) Control or (C) Brn3b-DTA mice by paired t-test.

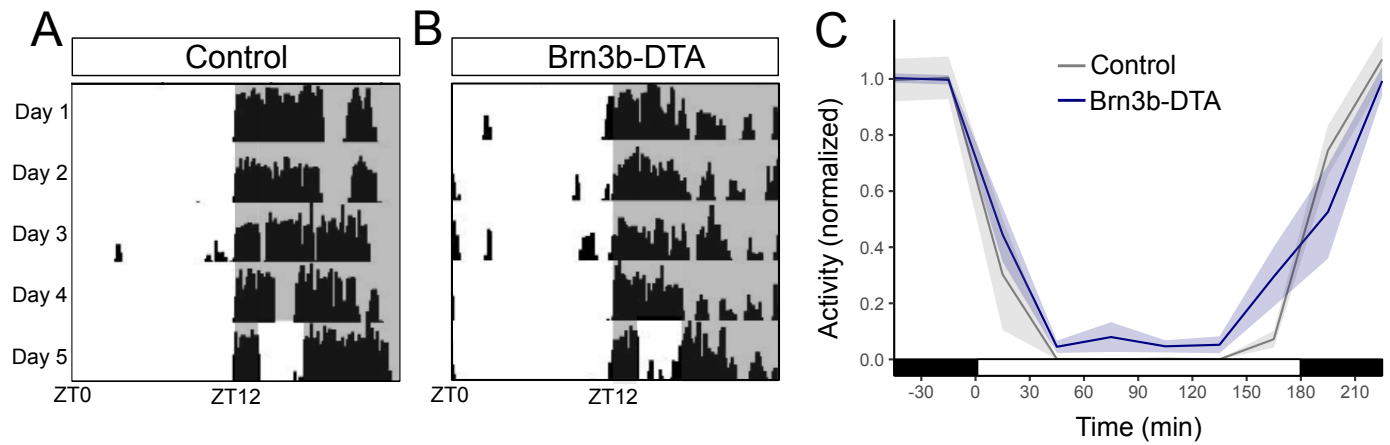

**Supplemental Figure 4: Wheel-running activity in Brn3b-DTA mice.** (A) Control ( $Opn4^{Cre/+}$ ,  $n = 5$ ) and (B) Brn3b-DTA ( $Opn4^{Cre/+}$ ;  $Brn3b^{DTA/+}$ ,  $n = 6$ ) were housed in a 12:12 LD cycle and subjected to a 3-hr light pulse starting at ZT14. (C) Activity counts in 30 minute bins for both groups. Wheel revolutions were normalized to the average activity for the 1 hour preceding the light pulse. Shading represents SEM. While both groups display robust wheel-running inhibition in response to the light pulse, Brn3b-DTA mice had a mild deficit compared to Controls ( $P = 0.039$  by linear mixed model).
